# Supplementary material
Source: MDPI journal article supplement (https://www.mdpi.com/2673-3943/5/2/6)
Supplement: s1 [file s1]

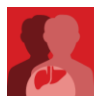**Supplementary Table S1: Reasons for kidney discard in the United States from 2010-2021**

| Reasons For Kidney Discard                             | n (%)              | 2010             | 2011             | 2012             | 2013             | 2014             | 2015              | 2016              | 2017              | 2018              | 2019              | 2020              | 2021              |
|--------------------------------------------------------|--------------------|------------------|------------------|------------------|------------------|------------------|-------------------|-------------------|-------------------|-------------------|-------------------|-------------------|-------------------|
| <b>Donor Factors</b>                                   | <b>756(1.7)</b>    | <b>44(1.7)</b>   | <b>58(2.2)</b>   | <b>47(1.7)</b>   | <b>51(1.9)</b>   | <b>56(1.9)</b>   | <b>65(2.1)</b>    | <b>77(2.1)</b>    | <b>60(1.7)</b>    | <b>59(1.6)</b>    | <b>63(1.4)</b>    | <b>64(1.3)</b>    | <b>112(1.7)</b>   |
| Donor Medical history                                  | 354(0.8)           | 8(0.3)           | 17(0.6)          | 15(0.5)          | 15(0.5)          | 12(0.4)          | 31(1)             | 23(0.6)           | 39(1.1)           | 32(0.9)           | 39(0.9)           | 43(0.8)           | 80(1.2)           |
| Donor social history                                   | 56(0.1)            | 2(0.1)           | 6(0.2)           | 12(0.4)          | 7(0.3)           | 5(0.2)           | 8(0.3)            | 11(0.3)           | 1(0)              | 0(0)              | 0(0)              | 2(0)              | 2(0)              |
| Positive CMV                                           | 1(0.0)             | 1(0)             | 0(0)             | 0(0)             | 0(0)             | 0(0)             | 0(0)              | 0(0)              | 0(0)              | 0(0)              | 0(0)              | 0(0)              | 0(0)              |
| Positive HIV                                           | 8(0.0)             | 0(0)             | 2(0.1)           | 0(0)             | 0(0)             | 2(0.1)           | 2(0.1)            | 0(0)              | 0(0)              | 0(0)              | 0(0)              | 0(0)              | 2(0)              |
| Positive Hepatitis                                     | 255(0.6)           | 24(0.9)          | 27(1)            | 15(0.5)          | 23(0.8)          | 35(1.2)          | 17(0.5)           | 34(0.9)           | 16(0.5)           | 21(0.6)           | 15(0.3)           | 12(0.2)           | 16(0.2)           |
| Infection                                              | 78(0.2)            | 9(0.3)           | 6(0.2)           | 5(0.2)           | 6(0.2)           | 2(0.1)           | 7(0.2)            | 9(0.2)            | 4(0.1)            | 6(0.2)            | 9(0.2)            | 5(0.1)            | 10(0.2)           |
| Inadequate urine output                                | 4(0.0)             | 0(0)             | 0(0)             | 0(0)             | 0(0)             | 0(0)             | 0(0)              | 0(0)              | 0(0)              | 0(0)              | 0(0)              | 2(0)              | 2(0)              |
| <b>Procurement Factors</b>                             | <b>1343(3.1)</b>   | <b>116(4.4)</b>  | <b>102(3.9)</b>  | <b>119(4.3)</b>  | <b>96(3.5)</b>   | <b>86(3)</b>     | <b>110(3.5)</b>   | <b>99(2.7)</b>    | <b>114(3.2)</b>   | <b>100(2.7)</b>   | <b>132(2.9)</b>   | <b>132(2.6)</b>   | <b>137(2.1)</b>   |
| Vascular damage                                        | 494(1.1)           | 41(1.6)          | 42(1.6)          | 42(1.5)          | 44(1.6)          | 33(1.1)          | 45(1.4)           | 37(1)             | 43(1.2)           | 38(1)             | 44(1)             | 48(0.9)           | 37(0.6)           |
| Ureteral damage                                        | 115(0.3)           | 9(0.3)           | 5(0.2)           | 4(0.1)           | 3(0.1)           | 9(0.3)           | 12(0.4)           | 11(0.3)           | 11(0.3)           | 3(0.1)            | 15(0.3)           | 11(0.2)           | 22(0.3)           |
| Organ trauma                                           | 497(1.1)           | 45(1.7)          | 33(1.2)          | 44(1.6)          | 40(1.5)          | 29(1)            | 43(1.4)           | 44(1.2)           | 41(1.2)           | 42(1.1)           | 52(1.2)           | 50(1)             | 34(0.5)           |
| WIT too long                                           | 237(0.5)           | 21(0.8)          | 22(0.8)          | 29(1)            | 9(0.3)           | 15(0.5)          | 10(0.3)           | 7(0.2)            | 19(0.5)           | 17(0.5)           | 21(0.5)           | 23(0.5)           | 44(0.7)           |
| <b>Organ Factors</b>                                   | <b>6240(14.2)</b>  | <b>539(20.4)</b> | <b>531(20.1)</b> | <b>566(20.4)</b> | <b>492(18)</b>   | <b>431(14.8)</b> | <b>479(15.2)</b>  | <b>500(13.7)</b>  | <b>523(14.8)</b>  | <b>514(13.7)</b>  | <b>548(12.2)</b>  | <b>547(10.8)</b>  | <b>570(8.7)</b>   |
| Organ not as described                                 | 113(0.3)           | 7(0.3)           | 9(0.3)           | 4(0.1)           | 8(0.3)           | 6(0.2)           | 11(0.3)           | 7(0.2)            | 13(0.4)           | 7(0.2)            | 13(0.3)           | 19(0.4)           | 9(0.1)            |
| Diseased organ                                         | 1098(2.5)          | 89(3.4)          | 91(3.4)          | 99(3.6)          | 64(2.3)          | 69(2.4)          | 87(2.8)           | 88(2.4)           | 117(3.3)          | 102(2.7)          | 117(2.6)          | 92(1.8)           | 83(1.3)           |
| Anatomical abnormalities                               | 2286(5.2)          | 165(6.2)         | 186(7)           | 226(8.2)         | 179(6.5)         | 171(5.9)         | 210(6.6)          | 199(5.5)          | 195(5.5)          | 184(4.9)          | 179(4)            | 186(3.7)          | 206(3.2)          |
| Poor organ function                                    | 2743(6.2)          | 278(10.5)        | 245(9.3)         | 237(8.6)         | 241(8.8)         | 185(6.4)         | 171(5.4)          | 206(5.6)          | 198(5.6)          | 221(5.9)          | 239(5.3)          | 250(4.9)          | 272(4.2)          |
|                                                        | <b>11907(27.1)</b> |                  |                  |                  |                  |                  | <b>1028(32.5)</b> | <b>1024(28.1)</b> |                   |                   | <b>1186(26.3)</b> | <b>1029(20.3)</b> |                   |
| <b>Biopsy findings</b>                                 | <b>1)</b>          | <b>993(37.6)</b> | <b>984(37.2)</b> | <b>932(33.7)</b> | <b>934(34.1)</b> | <b>986(33.9)</b> | <b>)</b>          | <b>)</b>          | <b>873(24.6)</b>  | <b>978(26.1)</b>  | <b>)</b>          | <b>)</b>          | <b>960(14.7)</b>  |
| <b>Transport</b>                                       | <b>647(1.5)</b>    | <b>41(1.6)</b>   | <b>47(1.8)</b>   | <b>58(2.1)</b>   | <b>36(1.3)</b>   | <b>45(1.5)</b>   | <b>45(1.4)</b>    | <b>62(1.7)</b>    | <b>53(1.5)</b>    | <b>60(1.6)</b>    | <b>66(1.5)</b>    | <b>46(0.9)</b>    | <b>88(1.4)</b>    |
| CIT too long (HMP)                                     | 153(0.3)           | 12(0.5)          | 18(0.7)          | 8(0.3)           | 4(0.1)           | 12(0.4)          | 11(0.3)           | 14(0.4)           | 6(0.2)            | 22(0.6)           | 17(0.4)           | 12(0.2)           | 17(0.3)           |
| CIT too long (SCS)                                     | 494(1.1)           | 29(1.1)          | 29(1.1)          | 50(1.8)          | 32(1.2)          | 33(1.1)          | 34(1.1)           | 48(1.3)           | 47(1.3)           | 38(1)             | 49(1.1)           | 34(0.7)           | 71(1.1)           |
| <b>Recipient determined to be unsuitable for Tx in</b> |                    |                  |                  |                  |                  |                  |                   |                   |                   |                   |                   |                   |                   |
| <b>OR</b>                                              | <b>183(0.4)</b>    | <b>24(0.9)</b>   | <b>13(0.5)</b>   | <b>13(0.5)</b>   | <b>13(0.5)</b>   | <b>16(0.6)</b>   | <b>20(0.6)</b>    | <b>17(0.5)</b>    | <b>11(0.3)</b>    | <b>20(0.5)</b>    | <b>7(0.2)</b>     | <b>18(0.4)</b>    | <b>11(0.2)</b>    |
| <b>No recipient located - list exhausted</b>           | <b>17094(38.9)</b> |                  |                  |                  |                  |                  |                   | <b>1414(38.7)</b> | <b>1495(42.2)</b> | <b>1571(41.9)</b> | <b>2022(44.9)</b> | <b>2621(51.6)</b> | <b>3955(60.7)</b> |
|                                                        | <b>9)</b>          | <b>488(18.5)</b> | <b>446(16.9)</b> | <b>604(21.8)</b> | <b>695(25.4)</b> | <b>837(28.8)</b> | <b>946(29.9)</b>  | <b>)</b>          | <b>)</b>          | <b>)</b>          | <b>)</b>          | <b>)</b>          | <b>)</b>          |
| <b>Other, specify</b>                                  | <b>5738(13.1)</b>  | <b>396(15)</b>   | <b>465(17.6)</b> | <b>429(15.5)</b> | <b>423(15.4)</b> | <b>449(15.5)</b> | <b>468(14.8)</b>  | <b>457(12.5)</b>  | <b>414(11.7)</b>  | <b>451(12)</b>    | <b>479(10.6)</b>  | <b>623(12.3)</b>  | <b>684(10.5)</b>  |

HIV: human immunodeficiency virus; CMV: Cytomegalovirus; WIT: warm ischemia time; CIT: cold ischemia time; HMP: hypothermic machine perfusion; SCS: static cold storage; Tx: transplantation; OR: operating room

**Supplementary Table S2:** Donor demographics for each individual kidney preserved using hypothermic machine perfusion (HMP) versus static cold storage (SCS).

| Donor Demographics                  | HMP (n=78263)   | SCS (n=132271)  |
|-------------------------------------|-----------------|-----------------|
| Age mean $\pm$ std                  | 42.9 $\pm$ 14.7 | 38.9 $\pm$ 16.4 |
| BMI mean $\pm$ std                  | 29 $\pm$ 7.3    | 27.7 $\pm$ 6.9  |
| Terminal SCr (mg/dL) mean $\pm$ std | 1.4 $\pm$ 1.4   | 1.3 $\pm$ 1.2   |
| KDPI Grouped n (%)                  |                 |                 |
| 0-20                                | 13897 (17.3)    | 37512 (27.2)    |
| 21-40                               | 15655 (19.8)    | 27860 (20.1)    |
| 41-60                               | 17228 (21.5)    | 25881 (18.7)    |
| 61-80                               | 18356 (22.5)    | 23543 (17.0)    |
| 81-100                              | 15378 (19.3)    | 23908 (17.2)    |
| Cortex biopsy n (%)                 | 57944 (72.0)    | 62424 (45.0)    |
| Donor Type n (%)                    |                 |                 |
| SCD                                 | 36126 (44.8)    | 99731(71.8)     |
| ECD                                 | 14329 (17.8)    | 24217 (17.4)    |
| DCD                                 | 30160 (37.4)    | 14957 (10.8)    |
| WIT mean $\pm$ std                  | 21.7 (15.9)     | 21.4 (14.1)     |

SCr: serum creatinine levels; KDPI: kidney donor profile index; SCD: standard criteria donor; ECD: extended criteria donor; DCD: donation after circulatory death ; WIT: warm ischemia time
